# Supplementary material for: Natural Killer Cell Receptors and Endometriosis: A Systematic Review
Source: MDPI journal article supplement (doi:10.3390/ijms24010331), 2022-12-25
Supplement: s1 [file s1]

**Table S1.** Search strategy

| Query                 | Search                                                                                                                                                                            |
|-----------------------|-----------------------------------------------------------------------------------------------------------------------------------------------------------------------------------|
| <b>PubMed/Medline</b> |                                                                                                                                                                                   |
| #1                    | (endometriosis[MeSH Terms]) OR (Endometrioses) OR (Endometrioma) OR (Endometriotic) OR (ectopic endometrium)                                                                      |
| #2                    | (cell, natural killer[MeSH Terms]) OR (NK cell) OR (Natural killer cell) OR (natural killer cell receptor)                                                                        |
| #3                    | #1 AND #2                                                                                                                                                                         |
| <b>EMBASE</b>         |                                                                                                                                                                                   |
| #1                    | ('endometriosis'/exp OR 'ectopic endometrium'/exp OR 'endometriosis' OR 'endometrioma' OR 'endometriotic' OR 'ectopic endometrium' OR 'endometrioses' OR 'endometriosis externa') |
| #2                    | ('natural killer cell'/exp OR 'natural killer cell' OR 'nk cell' OR 'natural killer cell receptor')                                                                               |
| #3                    | #1 AND #2                                                                                                                                                                         |
| <b>Scopus</b>         |                                                                                                                                                                                   |
| #1                    | TITLE-ABS-KEY ("endometriosis") OR TITLE-ABS-KEY("Endometrioses") OR TITLE-ABS-KEY("Endometrioma") OR TITLE-ABS-KEY("Endometriotic") OR TITLE-ABS-KEY("ectopic endometrium")      |
| #2                    | TITLE-ABS-KEY("NK cell") OR TITLE-ABS-KEY("Natural killer cell") OR TITLE-ABS-KEY("natural killer cell receptor")                                                                 |
| #3                    | #1 AND #2                                                                                                                                                                         |
| <b>Web of Science</b> |                                                                                                                                                                                   |
| #1                    | TS=("endometriosis" OR "Endometrioses" OR "Endometrioma" OR "Endometriotic" OR "ectopic endometrium")                                                                             |
| #2                    | TS=("NK cell" OR "Natural killer cell" OR "natural killer cell receptor")                                                                                                         |
| #3                    | #1 AND #2                                                                                                                                                                         |

MeSH, Medical Subject Headings.
